# Supplementary material
Source: Springer Nature journal article supplement (https://www.springermedizin.de/resource/supplementary/12884_2008_200_MOESM3_ESM.pdf/9459866)
Supplement: MOESM3 [file 9459866]

Trial (year)

***Improved perinatal care practices***

Manandhar (2004)

Jokhio (2005)

**Combined**

***Minimal goal-oriented antenatal care models***

Munjanja (1996)

Villar (2001)

Majoko (2007)

**Combined**

**OR (95% CI)**

**Deaths / N**  
(intervention) (standard)

**(Maternal deaths per 100,000)**  
(intervention) (standard)

0.28 (0.09, 0.82)

2/3190

11/3524

(69)

(341)

0.74 (0.45, 1.23)

27/10092

34/9432

(268)

(360)

**0.62 (0.39, 0.98)**

0.78 (0.23, 2.61)

6/9394

5/6138

(64)

(82)

1.11 (0.37, 3.29)

7/12568

6/11958

(60)

(54)

1.90 (0.38, 9.43)

4/5349

2/5223

(60)

(31)

**1.09 (0.53, 2.25)**

.05

1

20

Favours intervention

Favours standard care
